# Supplementary material for: Characteristics and Epidemiological Investigation of Paratuberculosis in Dairy Cattle in Tai’an, China
Source: Hindawi journal article supplement (doi:10.1155/2020/3896754), 2020-01-01

Supplementary figure 1

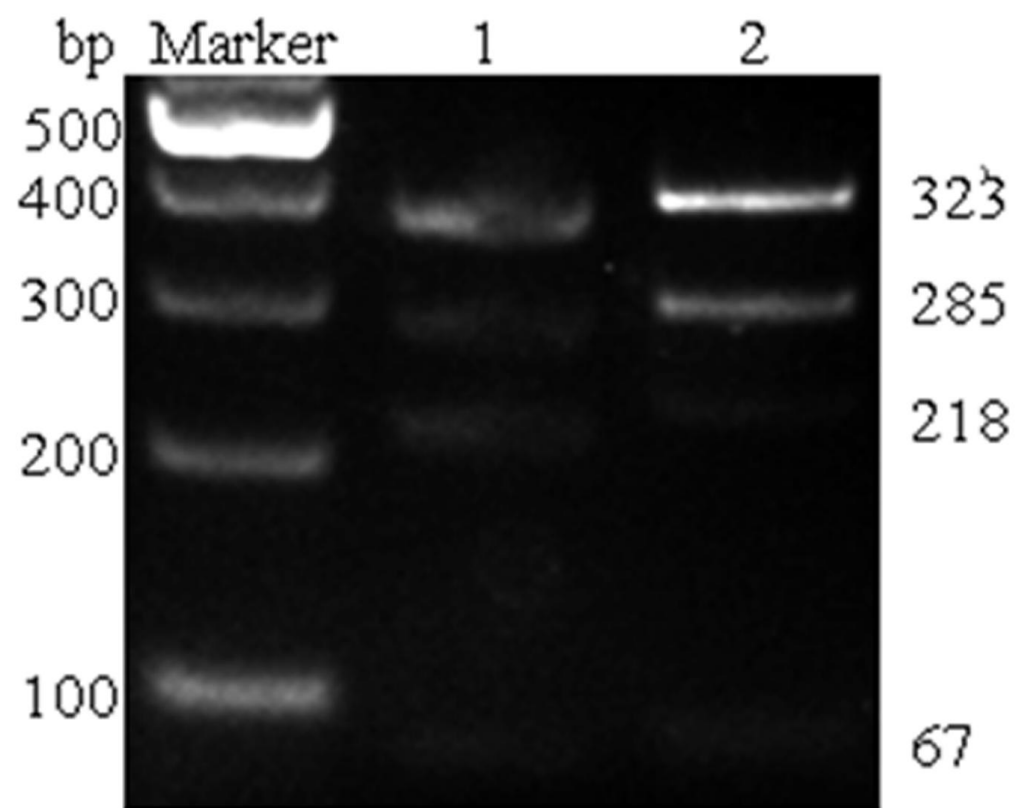

Supplement: f1 [file 3896754.f1.pdf]
